# Supplementary material
Source: Springer Nature journal article supplement (https://www.springermedizin.de/resource/supplementary/13063_2009_367_MOESM4_ESM.pdf/9618076)

The 3 possible treatments are:

## A - The Nafarelin long treatment

This treatment takes about 6 weeks - this is from starting to use the Nafarelin until the pregnancy test.

### Stage 1

On day 21 of your menstrual cycle

- Start using Nafarelin nasal spray
- Keep using the Nafarelin until your Human Chorionic Gonadotrophin (HCG) injection.

### Stage 2

About 2 weeks later

- FSH (Follicle Stimulating Hormone) injections are given every day to stimulate your ovaries
- These are continued until the HCG injection.

### Stage 3

About 9-14 days later

- The HCG injection is given
- This is to mature the eggs.

### Stage 4

36 hours later

- Egg collection takes place
- Starting on this day (when egg collection takes place), you will put a progesterone pessary into your vagina every day
- This will prepare the lining of your womb
- Use a pessary every day until the pregnancy test
- If the test is positive, keep using the pessaries until the 8th week of pregnancy.

### Stage 5

Two, three or five days later

- The embryos are put back into your womb.

### Stage 6

Two weeks later

- A pregnancy test is done.

## Treatment timeline

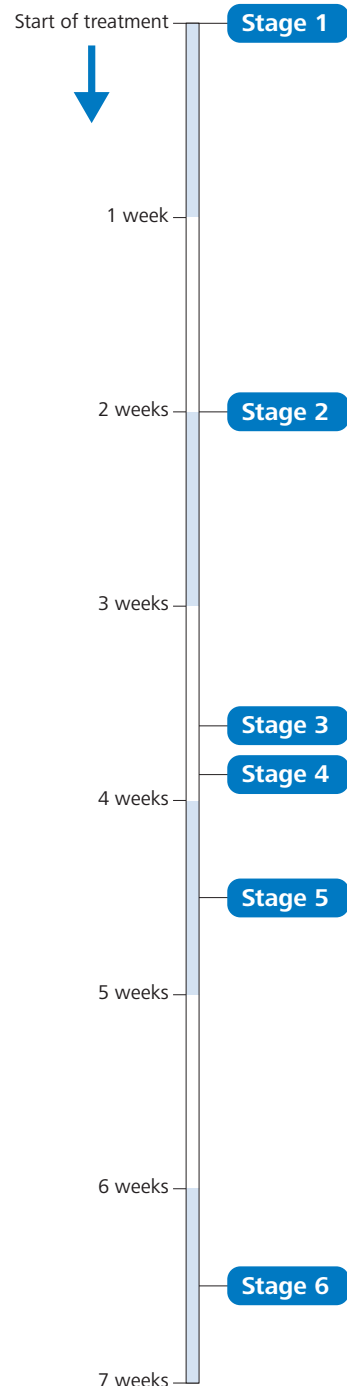

Supplement: MOESM4 [file 9618076]
